# Supplementary material for: Post-exercise Ingestion of Carbohydrate, Protein and Water: A Systematic Review and Meta-analysis for Effects on Subsequent Athletic Performance
Source: Springer Nature journal article supplement (doi:10.1007/s40279-017-0800-5), 2017-11-02
Supplement: MOESM1 [file 15186668]

## Electronic Supplementary Material

**Article Title:** Post-Exercise Ingestion of Carbohydrate, Protein and Water: A Systematic Review and Meta-Analysis for Effects on Subsequent Athletic Performance

**Journal Name:** Sports Medicine

**Author Names and Affiliations:** Danielle McCartney, Ben Desbrow, Christopher Irwin (School of Allied Health Sciences and Menzies Health Institute Queensland, Griffith University, Gold Coast, Australia)

**Corresponding Author Email Address:** [danielle.mccartney@griffithuni.edu.au](mailto:danielle.mccartney@griffithuni.edu.au)

**Table S1.** Sensitivity analyses of the %Δ MPO on CHO+W and PRO+CHO+W and %Δ PPO on CHO+W to determine risk of data dependency. Analyses one trial per publication, only. All other trials were excluded from these analyses.

| **Outcome** | **Trials (*n*)** | **%Δ MPO (95% CI)** | ***p* value** | ***I*2 index** |
| --- | --- | --- | --- | --- |
| **CHO–W vs. W** | | | | |
| %Δ MPO | 25 | 3.782 (2.797, 4.766) | <0.001 | 47.29 |
| %Δ PPO | 6 | 3.094 (1.304, 4.883) | <0.001 | 0.000 |
| **PRO+CHO+W vs. CHO+W** | | | | |
| %Δ MPO | 9 | 0.713 (-0.727, 2.153) | 0.332 | 67.74 |

**Table S2.** Methodological quality assessment summary and Rosendal Score of included studies.

| **Citation** | A clear description of the inclusion and exclusion criteria was provided | The trials were randomized | The method used to generate the random allocation sequence was described | Treatment order was counterbalanced | Sample size was justified | Attempts were made to control and/or monitor pre-trial conditions | Design incorporated measures of important baseline variables | Subjects were blinded | Investigators were blinded | Methods and successfulness of blinding were described | Details were provided regarding the inability of a subject to complete study requirements | Statistical methods used to compare groups for primary outcome measure(s), and methods for additional analyses were described | Both point measures and measures of variability for the primary outcome were provided | The results of between groups statistical comparisons were reported for the primary outcome measures | Reproducibility of the primary outcome measure(s) was reported | A familiarization of the performance test was conducted | **Total Score (%)** |
| --- | --- | --- | --- | --- | --- | --- | --- | --- | --- | --- | --- | --- | --- | --- | --- | --- | --- |
| **Studies Investigating CHO–W vs. W (Endurance Exercise Performance)** | | | | | | | | | | | | | | | | | |
| Murray, et al. (1989) [4] | 0 | 0 | - | 1 | 0 | 1 | 1 | 1 | 1 | 0 | - | 1 | 1 | 0 | 0 | 1 | 57 |
| Murray, et al. (1991) [5] | 0 | 0 | - | 1 | 0 | 1 | 1 | 1 | 1 | 0 | 1 | 1 | 0 | 1 | 0 | 1 | 64 |
| Burgess, et al. (1991) [6] | 0 | 0 | - | 1 | 0 | 1 | 1 | 1 | 0 | 0 | - | 1 | 1 | 1 | 0 | 0 | 50 |
| Millard-Stafford, et al. (1992) [34] | 1 | 0 | - | 1 | 0 | 1 | 1 | 1 | 1 | 0 | 1 | 1 | 1 | 1 | 0 | 1 | 73 |
| Cole, et al. (1993) [27] | 1 | 1 | 0 | 0 | 0 | 1 | 1 | 1 | 0 | 0 | - | 1 | 1 | 1 | 0 | 0 | 53 |
| Below, et al. (1995) [18] | 0 | 1 | - | 0 | 0 | 1 | 1 | 1 | 1 | 0 | - | 1 | 1 | 0 | 0 | 0 | 50 |
| El-Sayed, et al. (1995) [40] | 0 | 1 | 0 | 0 | 0 | 1 | 1 | 1 | 1 | 1 | - | 1 | 1 | 0 | 0 | 1 | 60 |
| McConnell, et al. (1996) [28] | 0 | 1 | 0 | 0 | 0 | 1 | 1 | 1 | 1 | 0 | - | 1 | 1 | 0 | 0 | 1 | 53 |
| Casey, et al. (2000) [50] | 1 | 0 | - | 0 | 0 | 1 | 1 | 1 | 1 | 0 | - | 1 | 1 | 1 | 0 | 1 | 64 |
| Wong, et al. (2000) [45] | 0 | 1 | 0 | 0 | 0 | 1 | 1 | 1 | 1 | 0 | - | 1 | 1 | 1 | 1 | 1 | 67 |
| Ivy, et al. (2003) [46] | 0 | 1 | 0 | 1 | 0 | 1 | 1 | 1 | 1 | - | 1 | 1 | 1 | 0 | 0 | 1 | 67 |
| Abbiss, et al. (2008) [19] | 1 | 1 | 0 | 1 | 0 | 1 | 1 | 1 | 1 | 0 | - | 1 | 1 | 0 | 0 | 1 | 67 |
| Osterberg, et al. (2008) [20] | 0 | 1 | 0 | 0 | 0 | 1 | 1 | 1 | 1 | 0 | - | 1 | 1 | 0 | 0 | 1 | 53 |
| Cox, et al. (2010) [30] | 0 | 0 | - | 1 | 0 | 1 | 1 | 0 | - | - | - | 1 | 0 | 1 | 0 | 1 | 50 |
| Smith, et al. (2010) [21] | 0 | 0 | - | 1 | 0 | 1 | 1 | 1 | 0 | 0 | - | 1 | 1 | 1 | 0 | 1 | 57 |
| Temesi, et al. (2010) [29] | 1 | 1 | 0 | 1 | 0 | 1 | 1 | 1 | 1 | 0 | 1 | 1 | 1 | 1 | 0 | 0 | 69 |
| Alghannam, et al. (2011) [47] | 0 | 1 | 0 | 0 | 0 | 1 | 1 | 1 | 0 | 1 | - | 1 | 1 | 1 | 0 | 0 | 53 |
| Ferguson-Stegall, et al. (2011) [22] | 0 | 1 | 0 | 0 | 0 | 1 | 1 | 1 | 1 | 0 | - | 1 | 1 | 1 | 0 | 1 | 60 |
| Lee, et al. (2011) [48] | 0 | 1 | 0 | 0 | 0 | 1 | 1 | 1 | 1 | 0 | 1 | 1 | 0 | 1 | 0 | 1 | 56 |
| Robson-Anseley, et al. (2011) [33] | 1 | 1 | 0 | 0 | 0 | 1 | 1 | 1 | 1 | 0 | - | 1 | 1 | 1 | 0 | 1 | 67 |
| Bonetti & Hopkins (2012) [51] | 0 | 1 | 0 | 1 | 0 | 1 | 1 | 1 | 1 | 0 | 1 | 1 | 1 | 1 | 0 | 1 | 69 |
| McGrawley, et al. (2012) [37] | 0 | 1 | 0 | 0 | 0 | 1 | 1 | 1 | 0 | 0 | - | 1 | 1 | 1 | 0 | 1 | 53 |
| Too, et al. (2012) [32] | 1 | 1 | 0 | 0 | 1 | 1 | 1 | 0 | - | - | 1 | 1 | 1 | 1 | 0 | 0 | 64 |
| Heesch, et al. (2013) [23] | 1 | 1 | 0 | 1 | 0 | 1 | 1 | 1 | 1 | 0 | - | 1 | 1 | 1 | 0 | 1 | 73 |
| Newell, et al. (2015) [24] | 1 | 1 | 0 | 1 | 0 | 1 | 1 | 1 | 1 | 0 | - | 1 | 1 | 1 | 0 | 1 | 73 |
| Greer, et al. (2011) [39] | 0 | 1 | 0 | 0 | 0 | 1 | 1 | 1 | 0 | 0 | 1 | 1 | 1 | 1 | 0 | 0 | 50 |
| **Studies Investigating CHO–W vs. W (Anaerobic Exercise Performance)** | | | | | | | | | | | | | | | | | |
| Ball, et al. (1995) [55] | 0 | 0 | - | 1 | 0 | 1 | 1 | 1 | 0 | 0 | - | 1 | 1 | 1 | 0 | 0 | 50 |
| Sugiura, et al. (1998) [67] | 0 | 1 | 0 | 0 | 0 | 1 | 1 | 1 | 1 | 0 | - | 1 | 1 | 1 | 0 | 1 | 60 |
| Jarvis, et al (1999) [68] | 1 | 0 | - | 1 | 0 | 1 | 1 | 1 | 1 | 0 | - | 1 | 1 | 1 | 0 | 0 | 64 |
| Clarke, et al. (2005) [66] | 0 | 1 | 0 | 0 | 0 | 1 | 1 | 1 | 1 | 0 | - | 1 | 1 | 1 | 1 | 1 | 67 |
| O’Neil, et al. (2013) [69] | 0 | 1 | 0 | 1 | 0 | 1 | 1 | 1 | 0 | 0 | - | 1 | 1 | 1 | 0 | 1 | 60 |
| **Studies Investigating PRO–CHO–W vs. CHO–W (Endurance Exercise Performance)** | | | | | | | | | | | | | | | | | |
| Ivy, et al. (2003) [46] | 0 | 1 | 0 | 1 | 0 | 1 | 1 | 1 | 1 | - | 1 | 1 | 1 | 0 | 0 | 1 | 67 |
| Betts, et al. (2005) [49] | 0 | 1 | 0 | 1 | 1 | 1 | 1 | 1 | 1 | 0 | - | 1 | 1 | 1 | 0 | 1 | 73 |
| Betts, et al. (2007) [14] | 0 | 1 | 0 | 1 | 0 | 1 | 1 | 1 | 1 | 1 | 1 | 1 | 1 | 1 | 0 | 1 | 81 |
| Breen, et al. (2010) [25] | 1 | 0 | - | 1 | 0 | 1 | 1 | 1 | 1 | 1 | - | 1 | 1 | 1 | 0 | 1 | 79 |
| Cepero, et al. (2010) [35] | 1 | 1 | 1 | 0 | 1 | 1 | 1 | 1 | 1 | 0 | - | 1 | 1 | 1 | 0 | 1 | 80 |
| Toone & Betts (2010) [36] | 0 | 1 | 0 | 1 | 0 | 1 | 1 | 1 | 1 | 1 | - | 1 | 0 | 1 | 1 | 1 | 73 |
| Alghannam, et al. (2011) [47] | 0 | 1 | 0 | 0 | 0 | 1 | 1 | 1 | 0 | 1 | - | 1 | 1 | 1 | 0 | 0 | 53 |
| Morifuji, et al. (2011) [31] | 0 | 0 | - | 0 | 0 | 1 | 1 | 1 | 1 | 0 | 1 | 1 | 1 | 1 | 0 | 0 | 56 |
| Siegler, et al. (2013) [26] | 1 | 1 | 0 | 0 | 0 | 1 | 1 | 1 | 1 | 0 | - | 1 | 1 | 1 | 0 | 1 | 67 |
| Ferguson-Stegall, et al. (2011) [22] | 0 | 1 | 0 | 0 | 0 | 1 | 1 | 1 | 1 | 0 | - | 1 | 1 | 1 | 0 | 1 | 60 |
| **Studies Excluded Due to Rosendal Score <50%** | | | | | | | | | | | | | | | | | |
| Singh, *et al.* (2002) [60] | 0 | 0 | - | 0 | 0 | 1 | 1 | 1 | 0 | 0 | 1 | 1 | 1 | 1 | 0 | 0 | 47 |
| Singh, *et al.* (2004) [61] | 0 | 0 | - | 0 | 0 | 1 | 1 | 1 | 0 | 0 | - | 1 | 1 | 1 | 0 | 0 | 43 |
| Mitchell, *et al*. (1989) [63] | 0 | 1 | 0 | 0 | 0 | 1 | 1 | 1 | 0 | 0 | - | 1 | 1 | 1 | 0 | 0 | 47 |
| Coggan, *et al*. (1987) [62] | 0 | 1 | 0 | 0 | 0 | 1 | 1 | 1 | 0 | 0 | - | 1 | 1 | 1 | 0 | 0 | 47 |

**Table S3.** Sensitivity analysis to determine the effect of CHO–W on endurance exercise performance using alternative levels of correlation to complete the meta-analysis, where R = 0.900, 0.715 (actual), 0.500 and 0.300.

| ***R*** | **%Δ MPO (95% CI)** | ***p* value** | ***I*2 index** |
| --- | --- | --- | --- |
| 0.900 | 4.212 (3.482, 4.942) | <0.001 | 66.74 |
| 0.715 | 3.974 (3.209, 4.739) | <0.001 | 43.90 |
| 0.500 | 3.711 (2.946, 4.476) | <0.001 | 22.37 |
| 0.300 | 3.602 (2.867, 4.337) | <0.001 | 19.54 |

**Table S4.** Sensitivity analysis to determine the effect of CHO–W on anaerobic exercise performance using alternative levels of correlation to complete the meta-analysis, where R = 0.950, 0.905 (actual), 0.500 and 0.300.

| ***R*** | **%Δ PPO (95% CI)** | ***p* value** | ***I*2 index** |
| --- | --- | --- | --- |
| 0.950 | 2.445 (1.333, 4.308) | <0.001 | 0.000 |
| 0.905 | 2.548 (0.535, 1.114) | <0.001 | 0.000 |
| 0.500 | 3.009 (0.619, 5.398) | 0.014 | 0.000 |
| 0.300 | 3.111 (0.557, 5.664) | 0.017 | 0.000 |

**Table S5.** Sensitivity analysis to determine the effect of PRO–CHO–W on endurance exercise performance using alternative levels of correlation to complete the meta-analysis, where R = 0.900, 0.752 (actual), 0.500 and 0.300.

| ***R*** | **%Δ MPO (95% CI)** | ***p* value** | ***I*2 index** |
| --- | --- | --- | --- |
| 0.900 | 0.512 (-0.501, 1.525) | 0.322 | 77.23 |
| 0.752 | 0.547 (-0.523, 1.616) | 0.316 | 72.92 |
| 0.500 | 0.522 (-0.634, 1.678) | 0.376 | 55.22 |
| 0.300 | 0.506 (-0.707, 1.719) | 0.414 | 51.39 |

**Table S6.** Subjective ratings of GI tolerance, where data were reported.

| **Citation** | **Time Point;**  **% Total Intervention Ingested** | **Intake at Time of Rating** | | | **Sensation** | **Mean Rating (%)** | |
| --- | --- | --- | --- | --- | --- | --- | --- |
| **Fluid (mL)** | **CHO (g)** | **Protein (g)** | **Control** | **Intervention** |
| Murray et al. (1989a) [4] | #1: 20 min P-EX; 25% | 174 | 10.4 | - | Nauseousness | 3 | 3 |
| Bloatedness | 8 | 3 |
| Stomach Upset | 3 | 5 |
| #2: 40 min P-EX; 50% | 348 | 20.8 | - | Nauseousness | 5 | 3 |
| Bloatedness | 8 | 8 |
| Stomach Upset | 5 | 0 |
| #3: 60 min P-EX; 75% | 522 | 31.2 | - | Nauseousness | 3 | 5 |
| Bloatedness | 8 | 8 |
| Stomach Upset | 3 | 5 |
| Murray et al. (1989b) [4] | #1: 20 min P-EX; 25% | 174 | 13.6 | - | Nauseousness | 3 | 5 |
| Bloatedness | 8 | 5 |
| Stomach Upset | 3 | 0 |
| #2: 40 min P-EX; 50% | 348 | 27.2 | - | Nauseousness | 5 | 3 |
| Bloatedness | 8 | 3 |
| Stomach Upset | 5 | 0 |
| #3: 60 min P-EX; 75% | 522 | 40.8 | - | Nauseousness | 3 | 5 |
| Bloatedness | 8 | 10 |
| Stomach Upset | 3 | 8 |
| Murray et al. (1989c) [4] | #1: 20 min P-EX; 25% | 174 | 17.3 | - | Nauseousness | 3 | 0 |
| Bloatedness | 8 | 8 |
| Stomach Upset | 3 | 0 |
| #2: 40 min P-EX; 50% | 348 | 34.6 | - | Nauseousness | 5 | 5 |
| Bloatedness | 8 | 8 |
| Stomach Upset | 5 | 0 |
| #3: 60 min P-EX; 75% | 522 | 51.9 | - | Nauseousness | 3 | 8 |
| Bloatedness | 8 | 8 |
| Stomach Upset | 3 | 3 |
| Murray et al. (1991a) [5] | #1: 40 min P-EX; 30% | 251 | 15.1 | - | Nauseousness | 3 | 5 |
| Stomach Upset | 2 | 7 |
| #2: 74 min P-EX; 70% | 629 | 37.7 | - | Nauseousness | 5 | 5 |
| Stomach Upset | 9 | 10 |
| #3: 113 min P-EX; 100% (15 min-post) | 880 | 52.8 | - | Nauseousness | 15 | 10 |
| Stomach Upset | 19 | 10 |
| Murray et al. (1991b) [5] | #1: 40 min P-EX; 30% | 251 | 30.2 | - | Nauseousness | 3 | 2 |
| Stomach Upset | 2 | 2 |
| #2: 74 min P-EX; 70% | 629 | 75.8 | - | Nauseousness | 5 | 3 |
| Stomach Upset | 9 | 9 |
| #3: 113 min P-EX; 100% (15 min-post) | 880 | 106 | - | Nauseousness | 15 | 7 |
| Stomach Upset | 19 | 10 |
| Murray et al. (1991c) [5] | #1: 40 min P-EX; 30% | 251 | 45.1 | - | Nauseousness | 3 | 8 |
| Stomach Upset | 2 | 10 |
| #2: 74 min P-EX; 70% | 629 | 113 | - | Nauseousness | 5 | 6 |
| Stomach Upset | 9 | 8 |
| #3: 113 min P-EX; 100% (15 min-post) | 880 | 158 | - | Nauseousness | 15 | 3 |
| Stomach Upset | 19 | 5 |
| Wong et al. (2000) [45] | #1: Baseline; 0% | 0 | 0 | - | Abdominal Discomfort | 1 | 3 |
| #2: 1 h REC; 36% | 1,296 | 88.9 | - | 2 | 2 |
| #3: 2 h REC; 68% | 2,439 | 168 | - | 13 | 15 |
| #4: 3 h REC; 100% | 3,582 | 247 | - | 23 | 20 |
| #5: 4 h REC; 100% (60 min-post) | 17 | 12 |
| #6: 15 min AP; 100% (75 min-post) | 26 | 31 |
| #7: 30 min AP; 100% (90 min-post) | 14 | 25 |
| #8: Post-AP; 100% (60 min-post) | 25 | 33 |

| Alghannam (2011a) [47] | #1: Baseline; 0% | 0 | 0 | - | Stomach Discomfort | 8 | 8 |
| --- | --- | --- | --- | --- | --- | --- | --- |
| #2: 45 min P-EX; 100% | 975 | 70.8 | - | 10 | 22 |
| Alghannam (2011b) [47] | #1: Baseline; 0% | 0 | 0 | 0 | Stomach Discomfort | 8 | 10 |
| #2: 45 min P-EX; 100% | 975 | 49.6 | 21.2 | 22 | 22 |
| McGawley et al. (2012) [37] | #1: 20 km P-EX; 50% | 404 | 57.5 | - | Stomach Upset | 23 | 15 |
| #2: 40 km P-EX; 100% | 808 | 115 | - | 31 | 23 |
| #3: Post-AP; 100% (40 min-post) | 46 | 38 |
| Too et al. (2012a) [73] | Average of rating ea. 20 min P-EX | 1,230 (max.) | 94.0 (max.) | - | Abdominal Pain | 14 | 30 |
| Nausea | 6 | 24 |
| Heartburn | 1 | 0 |
| Regurgitation | 0 | 7 |
| Belching | 9 | 48 |
| Bloating | 10 | 17 |
| Flatulence | 17 | 32 |
| Too et al. (2012a) [73] | Average of rating ea. 20 min P-EX | 1,230 (max.) | 94.0 (max.) | - | Abdominal Pain | 14 | 38 |
| Nausea | 6 | 9 |
| Heartburn | 1 | 3 |
| Regurgitation | 0 | 4 |
| Belching | 9 | 49 |
| Bloating | 10 | 10 |
| Flatulence | 17 | 13 |

AP: Athletic performance test; P-EX: Preceding exercise; REC: Recovery time. Ratings are presented as a percentage of the highest possible score on a given scale. Where the lowest obtainable score was 1 (i.e. rather than *zero*), the score was transformed by – 1 and divided by the adjusted maximum score to derive a percentage. Nb. Betts, Williams [14](a, b) did not present subjective gut fullness data; however, the manuscript indicates that participants’ ratings were similar after ingesting the control vs. intervention solutions. The data collected from two participants in this investigation were disregarded because they experienced severe GI distress that the performance test was terminated during Betts, *et al*.[14](a) control (CHO+W).
